# Supplementary material
Source: PubMed Central journal article supplement (PMC4519434)
Supplement: NIHMS669095-supplement.pdf [file NIHMS669095-supplement.pdf]

## ***Cis-Expression Quantitative Trait Loci Mapping Reveals Replicable Associations with Heroin Addiction in *OPRM1****

### ***Supplemental Information***

#### **Supplemental Methods**

##### *Cis-expression quantitative trait loci (cis-eQTL) mapping using human prefrontal cortex in the BrainCloud cohort*

*Cis*-eQTL mapping was conducted in the BrainCloud cohort, whose data have been made available to the scientific community. We obtained their single nucleotide polymorphism (SNP) genotype data from the Illumina Human1M-Duo (version 3) and HumanHap650Y (version 3) BeadChip arrays via the database of Genotypes and Phenotypes (dbGaP, accession number phs000417.v2.p1) and their gene expression data from the Illumina Human 49K Oligo array via the BrainCloud software (downloaded at <http://braincloud.jhmi.edu/>). The opioid receptor, mu 1 (*OPRM1*) gene was represented by the probe HEEBO-045-HCC45I7 (oligo ID: hHC017095, Figure S1), which is a constitutive exonic probe type that recognized all known transcripts of the gene and contained no SNPs in the probe sequence. Gene expression data are also available through the National Center for Biotechnology Information Gene Expression Omnibus (series number GSE30272). Quality control procedures taken with the BrainCloud data have been previously described (1, 2).

Our final BrainCloud analysis dataset included 110 European Americans and 114 African Americans, ranging in age from 0 to 78 years old, who had no neuropathological or neuropsychiatric diagnoses, no abuse of drugs or alcohol, and no positive toxicology result (1, 2). We did not analyze the fetal samples, given the widespread differences that can occur in gene

expression patterns between fetal development and postnatal life (1), or the few samples of Hispanic or Asian ancestry.

*Discovery cohort for heroin abuse association testing: Urban Health Study (UHS) heroin addiction cases vs. population controls*

Between 1986 and 2005, the UHS recruited over 12,000 subjects from the San Francisco Bay Area, by targeting communities with a high prevalence of injection drug use (3). UHS was designed to follow the incidence and prevalence of HIV-1 viral infection and other factors that affect the health of injection drug users. As previously described (4, 5), eligibility criteria for study entry included injection of an illicit drug in the past 30 days, ability to provide informed consent, and age 18 or older. UHS was a serial, cross-sectional, sero-epidemiological study designed to follow the incidence and prevalence of HIV-1 viral infection, among other factors that affect the health of injection drug users. Stored serum samples from 3,227 UHS subjects were selected for genotyping on the Illumina Omni1-Quad BeadChip, based on matching HIV-1 positive cases with highly exposed HIV-1 negative controls (6). Genotyping followed a restoration process to maximum the quality of genomic DNA using the Illumina Formalin-Fixed Paraffin-Embedded kit. The genotype concordance rate among HapMap control samples was 99.7%. Blind duplicate samples had a genotype concordance of 99.9%. The UHS genotype data are described elsewhere (6) and deposited in dbGaP (accession number phs000454.v1.p1).

UHS participants in the current study met the Office of National Drug Control Policy definition of heroin abuse (injecting 10+ times in the past 30 days) (7, 8). We used the National Survey on Drug Use and Health (NSDUH; 2008-2012) to evaluate the proportion of individuals who reported using heroin 10+ days in the past month and met Diagnostic and Statistical manual

of Mental Disorders, fourth edition (DSM-IV) (9) criteria for heroin dependence in the past year. NSDUH is an annual household-based survey of approximately 65,000 youth and adults aged 12 or older. NSDUH collects data on past month heroin and other substance use frequency and past year DSM-IV substance use disorder. To approximate the characteristics of the UHS cohort, we restricted the NSDUH analyses to adults who had used drugs in the past month ( $n = 245$ ). Because NSDUH only has past year substance use disorder (unlike UHS which used past month frequency), we further restricted the analysis to individuals who used heroin at least once in the past month ( $n = 161$ ). Analyses were conducted using SUDAAN version 11.0.1 to account for the complex sampling design. We found that, among individuals who reported using heroin 10 or more times in the past month, 87% met DSM-IV criteria for heroin abuse/dependence (Table S1). We expect that this positive predictive value in NSDUH would be even higher if the frequency of heroin use and DSM-IV criteria were both based on past month rather than past year assessment. UHS participants included in the current study were high-frequency abusers, averaging 80.9 times in the past month, and based on these NSDUH results, they were very likely to have met DSM-IV criteria for abuse/dependence.

For comparison with the UHS heroin addiction cases, we used other dbGaP study cohorts with genotype data available as a source of controls (Table S2). Our pipeline used to generate a data set for conducting genetic association testing with UHS cases and population controls is outlined in Figure S2. We conducted a meta-data survey to identify study cohorts that met each of the following criteria: 1) genome-wide SNP genotype data available from an Illumina platform; 2) participants aged 18 and older; 3) case/control, nested case/control, control set, longitudinal, cohort, or population-based study design; 4) availability of African American or Caucasian participants; and 5) consent group allowing for the study of substance addiction, either

specifically or under a general category such as general research or health research use. Our meta-data survey considered the inclusion of studies that were posted on dbGaP as of June 18, 2012. The six selected dbGaP study cohorts (Table S2) that passed through all steps in our selection pipeline (Figure S2) were genotyped on one of three Illumina BeadChip arrays (Omni1-Quad, 1M-Duo, or Omni2.5). Two of the selected study cohorts had data available on substance addiction (“Collaborative Genetic Study of Nicotine Dependence” and “Study of Addiction: Genetics and Environment”), and participants meeting the criteria for DSM-IV (9) opioid drug dependence from these cohorts were not considered for inclusion as controls.

#### *Quality control for the discovery cohort*

Our quality control procedures, which were modeled after prior studies using population controls (10-15), were implemented on the heroin addiction cases and each of the dbGaP datasets, separately by study and by ancestral group, using PLINK software (16) unless otherwise stated. The numbers of genotyped subjects passing quality control are outlined in Table S2.

Before implementing our own quality control procedures on the dbGaP datasets, we filtered the data based on preliminary quality control criteria that were recommended by the original study investigators, where available. Then, we began our own quality control procedures by excluding genotyped participants that failed any of the following criteria: call rate <90%; sample duplication as indicated by an identity-by-state estimate >90%; first-degree relatedness as indicated by an identity-by-descent estimate >40%; gender discordance; or excessive homozygosity. In African Americans only, relatedness was corroborated using kinship coefficients (>0.177 being indicative of first degree relatedness) from the KING program, which

was designed to circumvent the inflation of IBD estimates due to population stratification (17). For both duplicates and relative pairs/clusters, we retained the subject with the highest call rate and excluded the other implicated participants. Genotyped SNPs were excluded for any of the following: call rate <90%, minor allele frequency (MAF) <1%, and Hardy Weinberg equilibrium (HWE)  $p < 1 \times 10^{-4}$ .

Study participants passing the aforementioned criteria were compared to HapMap phase III reference populations of YRI (West Africans), CEU (European Americans), and CHB (Chinese) to evaluate their ancestral classifications. The STRUCTURE program was applied to self-identified African Americans and European Americans, separately, with 10,000 SNPs randomly distributed across the genome. Participants analyzed as European Americans had <25% African ancestry, and participants analyzed as African Americans had >25% African ancestry.

To ensure that there were no underlying biases driven by any one of the dbGaP control datasets before combining them with heroin addiction cases from UHS, we computed the lambda, or genomic control inflation factor ( $\lambda_{gc}$ ), for each pair-wise comparison of control datasets by using genotyped SNPs that overlap the two datasets, arbitrarily making case assignments to subjects from one dataset and control assignments to subjects from the other dataset, and running a logistic regression model to test SNP associations with the arbitrary case/control assignments. These comparisons revealed some bias between two of the African American control datasets (“Gene Environment Association Studies [GENEVA]: Genetics of Early Onset Stroke [GEOS] Study” and “A Multiethnic Genome-wide Scan of Prostate Cancer”,  $\lambda_{gc} = 1.10$ ), but this inflation was resolved by imposing a more stringent ancestral classification such that the few African American study participants with African ancestry <60% (the lower

limit of African ancestry for the ASW reference participants from HapMap) were removed. Following the additional exclusions, all of the resulting  $\lambda_{gc}$  values were  $\leq 1.05$ , as shown in Table S3 for European Americans and Table S4 for African Americans.

*Replication cohorts for heroin abuse association testing and their quality control*

The CIDR – Gelernter Study cohort was assembled from three different genetics projects on alcohol dependence (with oversampling of African Americans), cocaine dependence, and opioid dependence, as previously described (18). All participants were administered an electronic version of the Semi-Structured Assessment for Drug Dependence and Alcoholism (19), from which DSM-IV (9) diagnoses of major psychiatric traits, including lifetime dependence on alcohol, opioid, and other drugs, were derived. Genotyping was conducted on the Illumina Omni1-Quad BeadChip. We began by applying preliminary quality control metrics, as recommended by the original study investigators and provided in dbGaP. We then applied quality control and imputation procedures mimicking those used for the discovery cohort.

Participants in the Australian Heroin Dependence Study were ascertained from the following four datasets. 1) The Comorbidity and Trauma Study is a retrospective case-control study examining genetic and environmental factors contributing to heroin dependence liability, as previously described (20). The study was run in collaboration with Washington University, the Queensland Institute of Medical Research, and the National Drug and Alcohol Research Centre at the University of New South Wales. Case participants were recruited from maintenance clinics providing opioid replacement therapy in the greater Sydney region of Australia. DSM-IV (9) opioid dependence diagnoses of the cases were based on administration of a comprehensive psychiatric interview based on the Semi-Structured Assessment of the Genetics of Alcoholism—

Australia (21) augmented with sections drawn from other instruments assessing childhood trauma exposure, family history, and screening for borderline personality disorder. Control participants were recruited from employment centers and community centers, open street malls, and local press servicing the same geographical area as the opioid maintenance treatment clinics and either denied recreational use of opioids or had used these drugs recreationally fewer than 11 times in their lifetime. Their prevalence of non-opioid licit drug dependence and illicit drug dependence as well as childhood trauma exposure and other psychiatric disorders is elevated considerably versus estimates of similar measures in Australian general population samples. All participants provided blood samples as a source of DNA. 2) The Western Australia Study on Heroin Dependence focused both on genetic contributions to heroin dependence and response to naltrexone treatment of the disorder and included heroin addicted individuals from the greater Perth region. Case participants with a DSM-IV diagnosis of heroin dependence completed a clinical assessment and provided blood samples during their treatment at the Perth Naltrexone Clinic, now named as the Fresh Start Recovery Programme. 3) The Twin Study of Mole Development in Adolescence, an ongoing investigation of melanocytic naevi, was used as a source of population controls. Parents of these twins served as controls, and although they were not assessed for heroin dependence, they have largely survived the period of risk for heroin dependence, and by virtue of their participation in this research, were very likely to have a prevalence of heroin dependence lower than that in the general population. 4) The Hunter Community Study was used as an additional source of population controls. As described elsewhere (22), the Hunter Community Study is a population-based cohort study established to assess factors important in the health, well-being, social functioning, and economic consequences of ageing. Genotyping of the four assembled cohorts, altogether referred to as the

Australian Heroin Dependence Study, was conducted on either the Illumina 660W-Quad or 610-Quad BeadChip arrays. We conducted quality control using metrics, similar to the discovery cohort, as follows. Genotyped SNPs were filtered due to deviation from HWE ( $p \leq 10^{-6}$ ), MAF ( $\leq 0.01$ ), call rate ( $\leq 95\%$ ), and GenomeStudio genotype quality score ( $\leq 0.7$ ). Additional analyses were performed to detect cryptic relatedness among genotyped participants using a pi-hat cut-off of 0.1. Principal components analysis (PCA) was performed with the SmartPCA program in the Eigensoft 3.0 package (23) to identify outliers of non-European ancestry, based their relative distance from the center of the northern European group. Participants who were more than six standard deviations from the centroid of the first two eigenvectors were removed.

#### *Genotype imputation*

To capture the nominated *cis*-eQTL SNPs for association testing with heroin abuse, imputation of SNP genotypes was conducted with reference to 1000 Genomes haplotype panels (24) in UHS and each of the dbGaP datasets. We previously found that combining imputed SNPs derived from cases and controls genotyped on different arrays has the potential to create artifactual differences leading to biased genotype-phenotype associations (25). The bias can be circumvented by basing imputation on the intersection of SNPs available across all genotyping arrays (25). Therefore, for the UHS vs. population control analysis, our imputation procedure was conducted separately by study and by ancestral group, using a common set of genotyped SNPs available across all European Americans or African Americans as the input genotypes for imputation.

Among the various imputation software programs that are available, we used IMPUTE2 (26) (version 2.2.2) because we previously found that it provides the highest imputation quality



for African American studies when using the 1000 Genomes “cosmopolitan” panel consisting of all available reference participants from 14 diverse populations (denoted ALL) instead of using smaller panels consisting of more closely related reference participants (27). Others have recommended the “cosmopolitan” panel as well (26, 28, 29). More specifically, we used 1000 Genomes reference haplotype panels from 1,092 participants of European ( $n = 379$ ), African ( $n = 246$ ), East Asian ( $n = 286$ ), and admixed American ( $n = 181$ ) ancestry (February 2012 integrated variant set release version 3 available at [http://mathgen.stats.ox.ac.uk/impute/data\\_download\\_1000G\\_phase1\\_integrated.html](http://mathgen.stats.ox.ac.uk/impute/data_download_1000G_phase1_integrated.html)). Imputations were preceded by prephasing the study genotypes with the ShapeIT (version 2) program (30) to estimate haplotypes, using 500 conditioning states, recommended effective population sizes of 15,000 for African Americans and 11,418 for European Americans, and default settings for all other program options. The estimated study haplotypes were then input into IMPUTE2 to impute SNP genotypes based on the highly dense set of SNPs on the 1000 Genomes ALL reference haplotype panel. Imputations were conducted on 4.5 MB chunks with 1MB flanking buffers. Default options were used, except for 1) specifying “k\_hap” as 468 haplotypes for African Americans and 170 haplotypes for European Americans and 2) applying the “-filt\_rules\_1” option to remove SNPs that are monomorphic in both the AFR and EUR panels. For each imputed variant, IMPUTE2 output included probabilities for each of the three genotypes and an “info” metric (a fractional value typically between 0 and 1 with higher values being indicative of SNPs imputed with higher certainty). The genotype probabilities were converted into a single imputed genotype dosage value (a fractional value between 0 and 2 indicating the expected number of minor allele copies) to use for association testing.

*Statistical analyses: Association testing with heroin addiction*

SNPs identified from the *cis*-eQTL mapping were tested for association with heroin addiction in the UHS. Significantly associated SNPs in the UHS were then tested for replication in the CIDR – Gelernter Study and the Australian Heroin Dependence Study. Observed SNP genotypes or imputed SNP genotype dosages were tested for association using logistic regression models, separately by cohort and by ancestry group, in ProbABEL (31) (UHS and CIDR – Gelernter Study) or PLINK (32) (Australian Heroin Dependence Study) with adjustment for sex and selected eigenvectors to remove any bias due to population stratification. In the UHS and the CIDR – Gelernter Study, EIGENSTRAT (33) analyses were run, separately by cohort and by ancestry group, using a pruned set of genotyped SNPs in linkage equilibrium ( $r^2 < 0.5$ ). The top three ancestry-specific eigenvectors, which together explained >90% of the phenotype variance, were selected for each ancestry group in UHS and for the CIDR – Gelernter Study. For the Australian Heroin Dependence Study, although the participants were all of European ancestry, PCA was conducted using the SmartPCA program to determine whether additional admixture correction was needed for association analyses. The  $r^2$  setting of 0.8 was used to remove SNPs in high linkage disequilibrium with others in the panel. PCA generated seven eigenvectors to include when testing associations with heroin addiction.

**Table S1.** Concordance between heroin use threshold (past 30 days) for case designation and DSM-IV heroin abuse/dependence (past 12 months) in the National Household Survey on Drug use and Health data 2008-2012.

| <b>Times used<br/>heroin in past<br/>30 days</b> | <b>DSM-IV heroin abuse/dependence</b>          | <b>DSM-IV heroin abuse/dependence</b>          |
|--------------------------------------------------|------------------------------------------------|------------------------------------------------|
|                                                  | <b>No</b>                                      | <b>Yes</b>                                     |
|                                                  | <b>Weighted <i>n</i> (unweighted <i>n</i>)</b> | <b>Weighted <i>n</i> (unweighted <i>n</i>)</b> |
| < 10                                             | 17,064 (14)                                    | 29,409 (45)                                    |
| ≥ 10                                             | 11,396 (9)                                     | 74,538 (93)                                    |

Positive predictive value based on weighted data = 86.74%.

**Table S2.** Heroin addiction cases from the Urban Health Study, population controls from dbGaP, and independent cohorts of heroin addiction cases and controls.

| Study cohort                                                                               | Ref.     | dbGaP accession number(s)          | dbGaP consent groups                               | Ancestry group     | No. genotyped participants passing QC |          |
|--------------------------------------------------------------------------------------------|----------|------------------------------------|----------------------------------------------------|--------------------|---------------------------------------|----------|
|                                                                                            |          |                                    |                                                    |                    | Heroin addiction cases                | Controls |
| Urban Health Study                                                                         | (5, 6)   | phs000454.v1.p1                    | Health research (non-commercial)                   | European Americans | 711                                   | -        |
|                                                                                            |          |                                    |                                                    | African Americans  | 1,293                                 | -        |
| Study of Addiction: Genetics and Environment (SAGE) <sup>a</sup>                           | (34)     | phs000092.v1.p1                    | Health research; Alcoholism and related conditions | European Americans | -                                     | 2,386    |
|                                                                                            |          |                                    |                                                    | African Americans  | -                                     | 1,189    |
| Collaborative Genetic Study of Nicotine Dependence (COGEND) <sup>a</sup>                   | (35)     | phs000092.v1.p1<br>phs000404.v1.p1 | General research use                               | European Americans | -                                     | 886      |
|                                                                                            |          |                                    |                                                    | African Americans  | -                                     | 446      |
| Gene Environment Association Studies (GENEVA): Genetics of Early Onset Stroke (GEOS) Study | (36)     | phs000292.v1.p1                    | Studies of genes for medical conditions            | European Americans | -                                     | 90       |
|                                                                                            |          |                                    |                                                    | African Americans  | -                                     | 119      |
| A Multiethnic Genome-wide Scan of Prostate Cancer                                          | (37, 38) | phs000306.v2.p1                    | General research use; Health research and methods  | African Americans  | -                                     | 615      |
| Genome-Wide Association Study of Parkinson Disease: Genes and Environment                  | (39)     | phs000196.v2.p1                    | General research use                               | European Americans | -                                     | 1,982    |

| Study cohort                                                                               | Ref.     | dbGaP accession number(s) | dbGaP consent groups                                                                                                                                                        | Ancestry group                   | No. genotyped participants passing QC |                    |
|--------------------------------------------------------------------------------------------|----------|---------------------------|-----------------------------------------------------------------------------------------------------------------------------------------------------------------------------|----------------------------------|---------------------------------------|--------------------|
|                                                                                            |          |                           |                                                                                                                                                                             |                                  | Heroin addiction cases                | Controls           |
| High Density SNP Association Analysis of Melanoma: Case-Control and Outcomes Investigation | (40, 41) | phs000187.v1.p1           | General research use                                                                                                                                                        | European Americans               | -                                     | 1,040              |
| GWAS of Heroin Dependence (Australian Heroin Dependence Study)                             | (20)     | phs000277.v1.p1           | Substance use dependence only; Research on alcohol and tobacco related phenotypes; Substance dependence, childhood trauma and related disorders; Alcohol related conditions | Australians of European ancestry | 1,976                                 | 3,144 <sup>b</sup> |
| Alcohol Dependence GWAS in European- and African-Americans (CIDR –Gelernter Study)         | (18)     | phs000425.v1.p1           | Research on alcohol and alcohol related phenotypes/disorders                                                                                                                | African Americans                | 307                                   | 545                |

QC, quality control.

<sup>a</sup>SAGE is composed of three component studies, including the Collaborative Study on the Genetics of Alcoholism, the Family Study of Cocaine Dependence, and COGEND. Additional COGEND participants not included in SAGE were analyzed separately.

<sup>b</sup>A subset of the control group was comprised of participants from The Hunter Community Study, which are not available via dbGaP accession number phs000277.v1.p1.

**Table S3.** Genomic inflation factors from pairwise comparison of control study cohorts with European Americans.

|                      | <b>SAGE</b> | <b>COGEND</b> | <b>GENEVA Stroke</b> | <b>Parkinson's</b> | <b>Melanoma</b> |
|----------------------|-------------|---------------|----------------------|--------------------|-----------------|
| <b>SAGE</b>          | --          | 0.96          | 0.99                 | 1.05               | 1.05            |
| <b>COGEND</b>        | --          | --            | 1.00                 | 1.04               | 1.04            |
| <b>GENEVA Stroke</b> | --          | --            | --                   | 1.01               | 1.00            |
| <b>Parkinson's</b>   | --          | --            | --                   | --                 | 1.04            |

**Table S4.** Genomic inflation factors from pairwise comparison of control study cohorts with African Americans.

|                      | <b>SAGE</b> | <b>COGEND</b> | <b>GENEVA Stroke</b> | <b>Prostate</b> |
|----------------------|-------------|---------------|----------------------|-----------------|
| <b>SAGE</b>          | --          | 0.97          | 1.00                 | 1.05            |
| <b>COGEND</b>        | --          | --            | 0.99                 | 1.00            |
| <b>GENEVA Stroke</b> | --          | --            | --                   | 0.98            |

**Table S5.** *Cis*-eQTL analyses of 103 SNPs spanning *OPRM1* and its flanking region ( $\pm 100$ kb). SNP genotypes were tested for association with *OPRM1* expression level in prefrontal cortex samples from 110 European Americans and 114 African Americans, who were aged from 0 to 78 years old. SNPs are ordered by chromosomal position. *P* values less than 0.05 are shown in bold.

| SNP        | Base pair position<br>(NCBI build 36) | SNP type   | Distance to<br><i>OPRM1</i> | 1000 Genomes<br>EUR panel |                        | 1000 Genomes<br>AFR panel |                        | <i>P</i> ,<br>overall | <i>P</i> ,<br>European<br>Americans<br>only | <i>P</i> ,<br>African<br>Americans<br>only |
|------------|---------------------------------------|------------|-----------------------------|---------------------------|------------------------|---------------------------|------------------------|-----------------------|---------------------------------------------|--------------------------------------------|
|            |                                       |            |                             | Minor allele              | Minor allele frequency | Minor allele              | Minor allele frequency |                       |                                             |                                            |
| rs204426   | 154,305,678                           | intergenic | -96,457                     | T                         | 0.38                   | C                         | 0.47                   | 0.68                  | 0.87                                        | 0.16                                       |
| rs6907526  | 154,307,441                           | intergenic | -94,694                     | T                         | 0.0013                 | T                         | 0.16                   | 0.10                  | NA <sup>a</sup>                             | 0.091                                      |
| rs9397673  | 154,308,402                           | intergenic | -93,733                     | G                         | 0.23                   | G                         | 0.14                   | 0.28                  | 0.22                                        | 0.31                                       |
| rs7745892  | 154,308,430                           | intergenic | -93,705                     | C                         | 0.37                   | T                         | 0.47                   | 0.98                  | 0.95                                        | 0.85                                       |
| rs654359   | 154,311,095                           | intergenic | -91,040                     | C                         | 0.38                   | C                         | 0.46                   | 0.44                  | 0.59                                        | 0.48                                       |
| rs7758009  | 154,311,203                           | intergenic | -90,932                     | C                         | 0.19                   | C                         | 0.09                   | 0.89                  | 0.66                                        | 0.31                                       |
| rs7744543  | 154,312,928                           | intergenic | -89,207                     | A                         | 0.04                   | A                         | 0.11                   | 0.98                  | 0.23                                        | 0.41                                       |
| rs598832   | 154,314,311                           | intergenic | -87,824                     | G                         | 0.17                   | G                         | 0.06                   | 0.31                  | 0.31                                        | 0.076                                      |
| rs574350   | 154,316,536                           | intergenic | -85,599                     | G                         | 0.50                   | A                         | 0.45                   | 0.69                  | 0.95                                        | 0.22                                       |
| rs12174208 | 154,320,077                           | intergenic | -82,058                     | T                         | 0.19                   | T                         | 0.09                   | 0.82                  | 0.64                                        | 0.42                                       |
| rs647303   | 154,324,902                           | intergenic | -77,233                     | C                         | 0.27                   | C                         | 0.14                   | 0.79                  | 0.28                                        | <b>0.0010</b>                              |
| rs11759340 | 154,325,531                           | intergenic | -76,604                     | C                         | 0.10                   | C                         | 0.06                   | 0.56                  | 0.72                                        | 0.31                                       |
| rs17084782 | 154,326,487                           | intergenic | -75,648                     | A                         | 0.11                   | A                         | 0.05                   | 0.29                  | 0.38                                        | 0.93                                       |
| rs6900805  | 154,329,725                           | intergenic | -47,271                     | G                         | 0.27                   | G                         | 0.13                   | 0.79                  | 0.28                                        | <b>0.0010</b>                              |

| SNP        | Base pair position<br>(NCBI build 36) | SNP type   | Distance to<br><i>OPRM1</i> | 1000 Genomes<br>EUR panel |                        | 1000 Genomes<br>AFR panel |                        | <i>P</i> ,<br>overall | <i>P</i> ,<br>European<br>Americans<br>only | <i>P</i> ,<br>African<br>Americans<br>only |
|------------|---------------------------------------|------------|-----------------------------|---------------------------|------------------------|---------------------------|------------------------|-----------------------|---------------------------------------------|--------------------------------------------|
|            |                                       |            |                             | Minor allele              | Minor allele frequency | Minor allele              | Minor allele frequency |                       |                                             |                                            |
| rs10457901 | 154,336,610                           | intergenic | -65,525                     | G                         | 0.09                   | G                         | 0.24                   | 0.79                  | 0.35                                        | 0.63                                       |
| rs9371769  | 154,349,428                           | intergenic | -52,707                     | T                         | 0.35                   | T                         | 0.21                   | 0.95                  | 0.96                                        | 0.93                                       |
| rs1675903  | 154,351,287                           | intergenic | -50,848                     | A                         | 0.14                   | A                         | 0.10                   | 0.060                 | 0.54                                        | 0.083                                      |
| rs10499276 | 154,351,501                           | intergenic | -50,634                     | T                         | 0.11                   | T                         | 0.06                   | 0.44                  | 0.42                                        | 1.00                                       |
| rs12208106 | 154,352,661                           | intergenic | -49,474                     | C                         | 0.04                   | C                         | 0.06                   | 0.27                  | 0.35                                        | 0.25                                       |
| rs1772945  | 154,353,978                           | intergenic | -48,157                     | A                         | 0.50                   | A                         | 0.47                   | 0.68                  | 0.60                                        | 0.98                                       |
| rs9384169  | 154,354,864                           | intergenic | -47,271                     | C                         | 0.35                   | C                         | 0.36                   | 0.25                  | 0.90                                        | <b>0.046</b>                               |
| rs6914262  | 154,356,609                           | intergenic | -45,526                     | A                         | 0.39                   | A                         | 0.48                   | 0.72                  | 0.92                                        | 0.84                                       |
| rs1675902  | 154,357,060                           | intergenic | -45,075                     | A                         | 0.10                   | A                         | 0.01                   | 0.29                  | 0.65                                        | 0.46                                       |
| rs1319211  | 154,358,275                           | intergenic | -43,860                     | G                         | 0.27                   | G                         | 0.08                   | 0.73                  | 0.85                                        | 0.89                                       |
| rs7738859  | 154,359,447                           | intergenic | -42,688                     | T                         | 0.35                   | T                         | 0.29                   | 0.95                  | 0.93                                        | 0.71                                       |
| rs4870261  | 154,361,495                           | intergenic | -40,640                     | T                         | 0.15                   | T                         | 0.07                   | 0.81                  | 0.95                                        | 0.81                                       |
| rs9478495  | 154,365,602                           | intergenic | -36,533                     | A                         | 0.15                   | A                         | 0.24                   | 0.22                  | 0.89                                        | <b>0.015</b>                               |
| rs9285541  | 154,372,322                           | intergenic | -29,813                     | G                         | 0.20                   | G                         | 0.04                   | 0.63                  | 0.84                                        | 0.86                                       |
| rs1319339  | 154,372,877                           | intergenic | -29,258                     | C                         | 0.14                   | C                         | 0.01                   | 0.79                  | 0.68                                        | 0.47                                       |
| rs712242   | 154,374,865                           | intronic   | -27,270                     | C                         | 0.49                   | C                         | 0.41                   | 0.45                  | 0.90                                        | 0.43                                       |



| SNP       | Base pair position<br>(NCBI build 36) | SNP type | Distance to<br><i>OPRM1</i> | 1000 Genomes<br>EUR panel |                        | 1000 Genomes<br>AFR panel |                        | <i>P</i> ,<br>overall | <i>P</i> ,<br>European<br>Americans<br>only | <i>P</i> ,<br>African<br>Americans<br>only |
|-----------|---------------------------------------|----------|-----------------------------|---------------------------|------------------------|---------------------------|------------------------|-----------------------|---------------------------------------------|--------------------------------------------|
|           |                                       |          |                             | Minor allele              | Minor allele frequency | Minor allele              | Minor allele frequency |                       |                                             |                                            |
| rs9478496 | 154,374,876                           | intronic | -27,259                     | C                         | 0.15                   | C                         | 0.10                   | 0.99                  | 0.97                                        | 0.93                                       |
| rs712244  | 154,376,843                           | intronic | -25,292                     | G                         | 0.29                   | G                         | 0.03                   | 0.62                  | 0.86                                        | 0.43                                       |
| rs1294092 | 154,377,366                           | intronic | -24,769                     | G                         | 0.20                   | G                         | 0.02                   | 0.61                  | 0.80                                        | 0.88                                       |
| rs9478498 | 154,383,069                           | intronic | -19,066                     | T                         | 0.22                   | C                         | 0.48                   | 0.37                  | 0.21                                        | 0.61                                       |
| rs7776341 | 154,390,298                           | intronic | -11,837                     | C                         | 0.04                   | C                         | 0.21                   | 0.55                  | 0.54                                        | 0.63                                       |
| rs6912029 | 154,402,201                           | 5'-UTR   | 0                           | T                         | 0.04                   | T                         | 0.09                   | 0.60                  | 0.83                                        | 0.43                                       |
| rs1799971 | 154,402,490                           | missense | 0                           | G                         | 0.16                   | G                         | 0.01                   | 0.55                  | 0.73                                        | 0.75                                       |
| rs510769  | 154,403,712                           | intronic | 0                           | T                         | 0.23                   | T                         | 0.22                   | 0.45                  | 0.90                                        | 0.43                                       |
| rs514980  | 154,409,860                           | intronic | 0                           | C                         | 0.19                   | C                         | 0.12                   | 0.69                  | 0.76                                        | 0.86                                       |
| rs499796  | 154,414,385                           | intronic | 0                           | G                         | 0.19                   | G                         | 0.46                   | 0.55                  | 0.72                                        | 0.72                                       |
| rs3778146 | 154,419,618                           | intronic | 0                           | C                         | 0.15                   | C                         | 0.12                   | 0.16                  | 0.078                                       | 0.94                                       |
| rs3823010 | 154,420,845                           | intronic | 0                           | A                         | 0.15                   | A                         | 0.12                   | 0.12                  | 0.12                                        | 0.98                                       |
| rs3778150 | 154,425,351                           | intronic | 0                           | C                         | 0.15                   | C                         | 0.20                   | 0.089                 | <b>0.042</b>                                | 0.38                                       |
| rs6927269 | 154,429,999                           | intronic | 0                           | G                         | 0.15                   | G                         | 0.10                   | 0.11                  | 0.12                                        | 0.84                                       |
| rs4357147 | 154,431,672                           | intronic | 0                           | G                         | 0.0013                 | G                         | 0.08                   | 0.14                  | NA <sup>a</sup>                             | 0.16                                       |
| rs6923231 | 154,433,828                           | intronic | 0                           | A                         | 0.09                   | A                         | 0.04                   | 0.72                  | 0.79                                        | 0.78                                       |

| SNP        | Base pair position<br>(NCBI build 36) | SNP type   | Distance to<br><i>OPRM1</i> | 1000 Genomes<br>EUR panel |                        | 1000 Genomes<br>AFR panel |                        | <i>P</i> ,<br>overall | <i>P</i> ,<br>European<br>Americans<br>only | <i>P</i> ,<br>African<br>Americans<br>only |
|------------|---------------------------------------|------------|-----------------------------|---------------------------|------------------------|---------------------------|------------------------|-----------------------|---------------------------------------------|--------------------------------------------|
|            |                                       |            |                             | Minor allele              | Minor allele frequency | Minor allele              | Minor allele frequency |                       |                                             |                                            |
| rs3778153  | 154,435,577                           | intronic   | 0                           | A                         | 0.14                   | A                         | 0.11                   | 0.29                  | 0.39                                        | 0.96                                       |
| rs563649   | 154,449,660                           | 5'-UTR     | 0                           | T                         | 0.08                   | T                         | 0.09                   | 0.50                  | 0.26                                        | 0.83                                       |
| rs9479756  | 154,451,807                           | intronic   | 0                           | A                         | 0.10                   | A                         | 0.16                   | 0.57                  | 0.71                                        | 0.59                                       |
| rs562859   | 154,456,266                           | synonymous | 0                           | C                         | 0.32                   | C                         | 0.41                   | 0.054                 | <b>0.016</b>                                | 0.96                                       |
| rs12203621 | 154,459,438                           | intronic   | 0                           | A                         | 0.05                   | A                         | 0.08                   | 0.38                  | 0.83                                        | 0.26                                       |
| rs3798683  | 154,460,107                           | intronic   | 0                           | A                         | 0.16                   | A                         | 0.01                   | 0.57                  | 0.76                                        | 0.70                                       |
| rs647192   | 154,464,437                           | intronic   | 0                           | G                         | 0.22                   | G                         | 0.05                   | <b>0.0085</b>         | <b>0.0018</b>                               | 0.63                                       |
| rs9322447  | 154,466,013                           | intronic   | 0                           | A                         | 0.45                   | G                         | 0.35                   | 0.37                  | 0.57                                        | 0.60                                       |
| rs650825   | 154,470,229                           | intronic   | 0                           | A                         | 0.22                   | A                         | 0.17                   | <b>0.0034</b>         | <b>0.0017</b>                               | 0.45                                       |
| rs650245   | 154,470,394                           | 3'-UTR     | 0                           | A                         | 0.10                   | A                         | 0.28                   | 0.72                  | 0.68                                        | 0.68                                       |
| rs632395   | 154,478,944                           | intronic   | 0                           | A                         | 0.10                   | A                         | 0.20                   | 0.64                  | 0.68                                        | 0.64                                       |
| rs512053   | 154,481,209                           | intronic   | 0                           | T                         | 0.08                   | T                         | 0.01                   | 0.78                  | 0.58                                        | 0.69                                       |
| rs671531   | 154,482,434                           | intronic   | 148                         | A                         | 0.32                   | A                         | 0.43                   | <b>0.015</b>          | <b>0.010</b>                                | 0.92                                       |
| rs558948   | 154,483,556                           | intronic   | 1,270                       | T                         | 0.22                   | T                         | 0.16                   | <b>0.0017</b>         | <b>0.00094</b>                              | 0.71                                       |
| rs10485058 | 154,486,907                           | intronic   | 4,621                       | G                         | 0.17                   | G                         | 0.05                   | 0.53                  | 0.51                                        | 0.83                                       |
| rs613355   | 154,491,542                           | intronic   | 9,256                       | C                         | 0.32                   | C                         | 0.40                   | <b>0.010</b>          | <b>0.012</b>                                | 0.72                                       |

| SNP        | Base pair position<br>(NCBI build 36) | SNP type | Distance to<br><i>OPRM1</i> | 1000 Genomes<br>EUR panel |                        | 1000 Genomes<br>AFR panel |                        | <i>P</i> ,<br>overall | <i>P</i> ,<br>European<br>Americans<br>only | <i>P</i> ,<br>African<br>Americans<br>only |
|------------|---------------------------------------|----------|-----------------------------|---------------------------|------------------------|---------------------------|------------------------|-----------------------|---------------------------------------------|--------------------------------------------|
|            |                                       |          |                             | Minor allele              | Minor allele frequency | Minor allele              | Minor allele frequency |                       |                                             |                                            |
| rs636433   | 154,494,178                           | intronic | 11,892                      | A                         | 0.10                   | A                         | 0.09                   | 0.49                  | 0.94                                        | 0.25                                       |
| rs538174   | 154,494,229                           | intronic | 11,943                      | C                         | 0.22                   | C                         | 0.05                   | <b>0.012</b>          | <b>0.0028</b>                               | 1.00                                       |
| rs544093   | 154,499,185                           | intronic | 16,899                      | G                         | 0.10                   | G                         | 0.13                   | 0.39                  | 0.94                                        | 0.28                                       |
| rs2010884  | 154,499,899                           | intronic | 17,613                      | A                         | 0.22                   | A                         | 0.10                   | 0.22                  | 0.42                                        | 0.15                                       |
| rs655059   | 154,500,548                           | intronic | 18,262                      | C                         | 0.06                   | C                         | 0.01                   | 0.86                  | 0.67                                        | 0.47                                       |
| rs13203628 | 154,502,815                           | intronic | 20,529                      | G                         | 0.24                   | G                         | 0.35                   | <b>0.037</b>          | <b>0.010</b>                                | 0.82                                       |
| rs13193545 | 154,503,514                           | intronic | 21,228                      | C                         | 0.19                   | C                         | 0.01                   | 0.063                 | 0.064                                       | 0.81                                       |
| rs518596   | 154,504,070                           | intronic | 21,784                      | G                         | 0.37                   | A                         | 0.40                   | 0.12                  | 0.14                                        | 0.77                                       |
| rs10223804 | 154,504,084                           | intronic | 21,798                      | A                         | 0.18                   | A                         | 0.01                   | 0.27                  | 0.43                                        | 0.74                                       |
| rs6557337  | 154,504,746                           | intronic | 22,460                      | T                         | 0.38                   | C                         | 0.44                   | 0.71                  | 0.58                                        | 0.82                                       |
| rs483481   | 154,505,660                           | intronic | 23,374                      | A                         | 0.43                   | A                         | 0.31                   | 0.96                  | 0.95                                        | 0.91                                       |
| rs4869817  | 154,508,510                           | intronic | 26,224                      | A                         | 0.47                   | A                         | 0.49                   | 0.68                  | 0.69                                        | 0.48                                       |
| rs9397178  | 154,511,909                           | intronic | 29,623                      | G                         | 0.07                   | G                         | 0.07                   | 0.89                  | 0.58                                        | 0.98                                       |
| rs13196610 | 154,512,887                           | intronic | 30,601                      | G                         | 0.07                   | G                         | 0.06                   | 0.45                  | 0.50                                        | 0.69                                       |
| rs4870268  | 154,514,019                           | intronic | 31,733                      | C                         | 0.47                   | C                         | 0.47                   | 0.81                  | 0.77                                        | 0.99                                       |
| rs17277929 | 154,519,605                           | 3'-UTR   | 37,319                      | C                         | 0.15                   | C                         | 0.06                   | 0.91                  | 0.96                                        | 0.27                                       |

| SNP        | Base pair position<br>(NCBI build 36) | SNP type | Distance to<br><i>OPRM1</i> | 1000 Genomes<br>EUR panel |                        | 1000 Genomes<br>AFR panel |                        | <i>P</i> ,<br>overall | <i>P</i> ,<br>European<br>Americans<br>only | <i>P</i> ,<br>African<br>Americans<br>only |
|------------|---------------------------------------|----------|-----------------------------|---------------------------|------------------------|---------------------------|------------------------|-----------------------|---------------------------------------------|--------------------------------------------|
|            |                                       |          |                             | Minor allele              | Minor allele frequency | Minor allele              | Minor allele frequency |                       |                                             |                                            |
| rs2236256  | 154,520,132                           | 3'-UTR   | 37,846                      | C                         | 0.42                   | C                         | 0.45                   | 0.29                  | 0.22                                        | 0.74                                       |
| rs1950005  | 154,523,086                           | intronic | 40,800                      | G                         | 0.42                   | G                         | 0.47                   | 0.31                  | 0.22                                        | 0.69                                       |
| rs1918760  | 154,523,859                           | intronic | 41,573                      | C                         | 0.34                   | C                         | 0.20                   | 0.12                  | 0.11                                        | 0.66                                       |
| rs2281617  | 154,529,113                           | intronic | 46,827                      | T                         | 0.12                   | T                         | 0.28                   | 0.87                  | 0.36                                        | 0.76                                       |
| rs6939625  | 154,529,487                           | intronic | 47,201                      | A                         | 0.05                   | A                         | 0.28                   | 0.98                  | 0.86                                        | 0.58                                       |
| rs6941251  | 154,529,669                           | intronic | 47,383                      | C                         | 0.41                   | C                         | 0.22                   | 0.63                  | 0.48                                        | 0.97                                       |
| rs12208947 | 154,532,829                           | intronic | 50,543                      | A                         | 0.12                   | A                         | 0.19                   | 0.67                  | 0.36                                        | 0.55                                       |
| rs7745499  | 154,534,546                           | intronic | 52,260                      | A                         | 0.41                   | A                         | 0.20                   | 0.57                  | 0.52                                        | 0.96                                       |
| rs13437608 | 154,541,831                           | intronic | 59,545                      | T                         | 0.06                   | T                         | 0.11                   | 0.41                  | 0.82                                        | 0.32                                       |
| rs17278409 | 154,542,817                           | intronic | 60,531                      | T                         | 0.21                   | T                         | 0.28                   | 0.88                  | 0.63                                        | 0.92                                       |
| rs9479779  | 154,544,380                           | intronic | 62,094                      | G                         | 0.07                   | G                         | 0.08                   | 0.30                  | 0.57                                        | <b>0.042</b>                               |
| rs11965988 | 154,545,204                           | intronic | 62,918                      | C                         | 0.07                   | C                         | 0.19                   | 0.94                  | 0.47                                        | 0.97                                       |
| rs9371331  | 154,545,564                           | intronic | 63,278                      | G                         | 0.25                   | G                         | 0.12                   | 0.85                  | 0.94                                        | 0.52                                       |
| rs7452342  | 154,554,189                           | intronic | 71,903                      | T                         | 0.35                   | T                         | 0.20                   | 0.20                  | 0.15                                        | 0.77                                       |
| rs4626436  | 154,554,890                           | intronic | 72,604                      | A                         | 0.05                   | A                         | 0.22                   | 0.68                  | 0.48                                        | 0.30                                       |
| rs10485060 | 154,557,793                           | intronic | 75,507                      | A                         | 0.06                   | A                         | 0.02                   | <b>0.039</b>          | 0.34                                        | 0.24                                       |

| SNP       | Base pair position<br>(NCBI build 36) | SNP type | Distance to<br><i>OPRM1</i> | 1000 Genomes<br>EUR panel |                        | 1000 Genomes<br>AFR panel |                        | <i>P</i> ,<br>overall | <i>P</i> ,<br>European<br>Americans<br>only | <i>P</i> ,<br>African<br>Americans<br>only |
|-----------|---------------------------------------|----------|-----------------------------|---------------------------|------------------------|---------------------------|------------------------|-----------------------|---------------------------------------------|--------------------------------------------|
|           |                                       |          |                             | Minor allele              | Minor allele frequency | Minor allele              | Minor allele frequency |                       |                                             |                                            |
| rs1040822 | 154,560,330                           | intronic | 78,044                      | G                         | 0.41                   | G                         | 0.31                   | 0.62                  | 0.88                                        | 0.61                                       |
| rs2295676 | 154,562,084                           | intronic | 79,798                      | A                         | 0.31                   | A                         | 0.11                   | 0.052                 | 0.074                                       | 0.62                                       |
| rs9322451 | 154,564,353                           | intronic | 82,067                      | A                         | 0.20                   | A                         | 0.26                   | 0.17                  | 0.44                                        | 0.59                                       |
| rs1852629 | 154,564,432                           | intronic | 82,146                      | T                         | 0.39                   | T                         | 0.40                   | <b>0.044</b>          | 0.090                                       | 0.38                                       |
| rs6557339 | 154,569,846                           | intronic | 87,560                      | C                         | 0.28                   | C                         | 0.23                   | 0.30                  | 0.060                                       | 0.95                                       |
| rs9479791 | 154,571,206                           | intronic | 88,920                      | T                         | 0.15                   | T                         | 0.24                   | 0.43                  | 0.37                                        | 0.49                                       |
| rs6913456 | 154,572,672                           | intronic | 90,386                      | G                         | 0.35                   | G                         | 0.34                   | 0.55                  | 0.21                                        | 0.39                                       |
| rs790252  | 154,576,104                           | intronic | 93,818                      | A                         | 0.20                   | A                         | 0.12                   | 0.21                  | 0.21                                        | 0.80                                       |
| rs9478526 | 154,577,270                           | intronic | 94,984                      | C                         | 0.08                   | C                         | 0.13                   | 0.42                  | 0.57                                        | 0.32                                       |

NCBI, National Center for Biotechnology Information; SNP, single nucleotide polymorphism; UTR, untranslated region.

<sup>a</sup>The association result was not available (NA), because the SNP was monomorphic.

**Table S6.** Regulatory annotation, according to HaploReg, for the 16 newly implicated *cis*-eQTL SNPs. HaploReg output includes information on 7 regulatory features: SiPhy (SItE-specific PHYlogenetic) conservation, promoter histone marks, enhancer histone marks from the Roadmap Epigenome Mapping Consortium, DNase hypersensitivity from ENCODE, proteins bound, eQTL tissues from the Genotype-Tissue Expression eQTL browser, and motifs changed based on position weight matrix scores from ENCODE to identify transcription factor binding sites. Other HaploReg regulatory features, for which none of the *OPRMI* SNPs were implicated, are not shown. A dash (“-”) indicates that the regulatory feature was not indicated for a specific SNP. SNPs are sorted by chromosomal position.

| SNP        | Position (NCBI build 36) | SiPhy conservation | Enhancer histone marks | DNase                                                                   | Motifs changed                      |
|------------|--------------------------|--------------------|------------------------|-------------------------------------------------------------------------|-------------------------------------|
| rs647303   | 154,324,902              | -                  | -                      | -                                                                       | ATF2, Cdx, HLF, Hsf, lrf, Pou5f1    |
| rs6900805  | 154,329,725              | -                  | -                      | -                                                                       | -                                   |
| rs9384169  | 154,354,864              | -                  | -                      | -                                                                       | GR,T3R                              |
| rs9478495  | 154,365,602              | -                  | -                      | -                                                                       | Mrg1::Hoxa9,NF-I                    |
| rs3778150  | 154,425,351              | Yes                | -                      | -                                                                       | NFAT, NFAT1                         |
| rs562859   | 154,456,266              | -                  | -                      | BE2_C                                                                   | Pou2f2                              |
| rs647192   | 154,464,437              | -                  | -                      | -                                                                       | Arid5b,Brachyury,Foxa               |
| rs650825   | 154,470,229              | -                  | -                      | -                                                                       | HNF4,Smad3                          |
| rs671531   | 154,482,434              | -                  | -                      | -                                                                       | -                                   |
| rs558948   | 154,483,556              | -                  | -                      | -                                                                       | Foxo, Sox, TCF11::MafG              |
| rs613355   | 154,491,542              | -                  | -                      | -                                                                       | Foxa, Foxc1, GR, HDAC2, TCF12, p300 |
| rs538174   | 154,494,229              | -                  | -                      | -                                                                       | Foxp1                               |
| rs13203628 | 154,502,815              | -                  | H1                     | H1-hESC, CD34+_Mobilized, CMK, H7-hESC, Monocytes-CD14+_RO01746, NT2-D1 | Hmx, Myb, RFX5                      |
| rs9479779  | 154,544,380              | -                  | -                      | -                                                                       | -                                   |

| <b>SNP</b> | <b>Position (NCBI build 36)</b> | <b>SiPhy conservation</b> | <b>Enhancer histone marks</b> | <b>DNase</b> | <b>Motifs changed</b> |
|------------|---------------------------------|---------------------------|-------------------------------|--------------|-----------------------|
| rs10485060 | 154,557,793                     | -                         | -                             | -            | HNF4,Pax-4,RXRA       |
| rs1852629  | 154,564,4                       | -                         | -                             | -            | SIX5,SRF              |

NCBI, National Center for Biotechnology Information; SNP, single nucleotide polymorphism.

**Table S7.** Four SNPs tested for association with heroin addiction in two independent replication cohorts, the CIDR – Gelernter Study and the Australian Heroin Dependence Study. SNPs are sorted by their meta-analysis *P* value across the replication cohorts.

| <b>CIDR – Gelernter Study,<br/>African Americans<br/>(<i>n</i> = 307 cases and 545 controls)</b> |                 |                    | <b>Australian Heroin Dependence Study,<br/>Australians of European ancestry<br/>(<i>n</i> = 1,976 cases and 3,144 controls)</b> |                      |                    | <b>Meta-analysis<br/><i>P</i> across<br/>replication<br/>cohorts</b> | <b>Meta-analysis<br/><i>P</i> across<br/>discovery and<br/>replication<br/>cohorts</b> |
|--------------------------------------------------------------------------------------------------|-----------------|--------------------|---------------------------------------------------------------------------------------------------------------------------------|----------------------|--------------------|----------------------------------------------------------------------|----------------------------------------------------------------------------------------|
| <b>SNP<br/>(Minor Allele)</b>                                                                    | <b><i>P</i></b> | <b>OR (95% CI)</b> | <b>SNP<br/>(Minor Allele)</b>                                                                                                   | <b><i>P</i></b>      | <b>OR (95% CI)</b> |                                                                      |                                                                                        |
| rs3778150 (C)                                                                                    | 0.17            | 1.20 (0.93-1.59)   | rs3778150 (C)                                                                                                                   | $1.7 \times 10^{-4}$ | 1.23 (1.11-1.39)   | $6.3 \times 10^{-5}$                                                 | $4.3 \times 10^{-8}$                                                                   |
| rs9478495 (A)                                                                                    | 0.76            | 1.04 (0.81-1.33)   | rs9478495 (A)                                                                                                                   | 0.087                | 1.10 (0.99-1.23)   | 0.090                                                                | $3.2 \times 10^{-5}$                                                                   |
| rs9384169 (C)                                                                                    | 0.95            | 0.99 (0.79-1.25)   | rs9371769 (A) <sup>a</sup>                                                                                                      | 0.44                 | 1.04 (0.95-1.13)   | 0.49                                                                 | $3.8 \times 10^{-3}$                                                                   |
| rs562859 (C)                                                                                     | 0.55            | 1.07 (0.86-1.34)   | rs548646 (A) <sup>a</sup>                                                                                                       | 0.90                 | 1.01 (0.91-1.09)   | 0.73                                                                 | $1.3 \times 10^{-2}$                                                                   |

CI, confidence interval; OR, odds ratio; SNP, single nucleotide polymorphism.

<sup>a</sup>Rs9384169 and rs562859 were not available as genotyped SNPs in the Australian Heroin Dependence Study, so the proxy SNPs rs9371769 ( $r^2 = 0.97$  and  $D' = 0.98$  with rs9384169 in the 1000 Genomes EUR panel) and rs548646 ( $r^2 = 0.98$  and  $D' = 0.99$  with rs562859) were used.

70bp probe ID HEEBO-045-HCC45I7,  
located at 154,454,202-154,454,271  
(NCBI build 36)

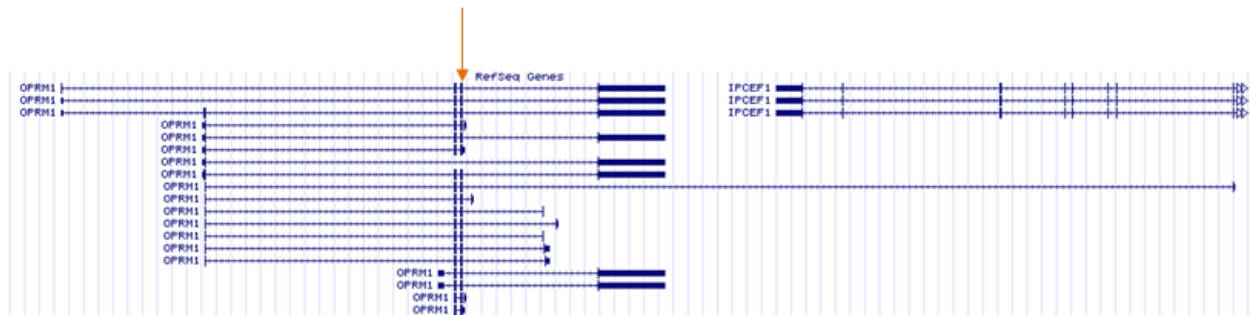

**Figure S1.** Location of the single *OPRM1* probe available in BrainCloud in relation to the known mRNA transcripts. NCBI, National Center for Biotechnology Information.



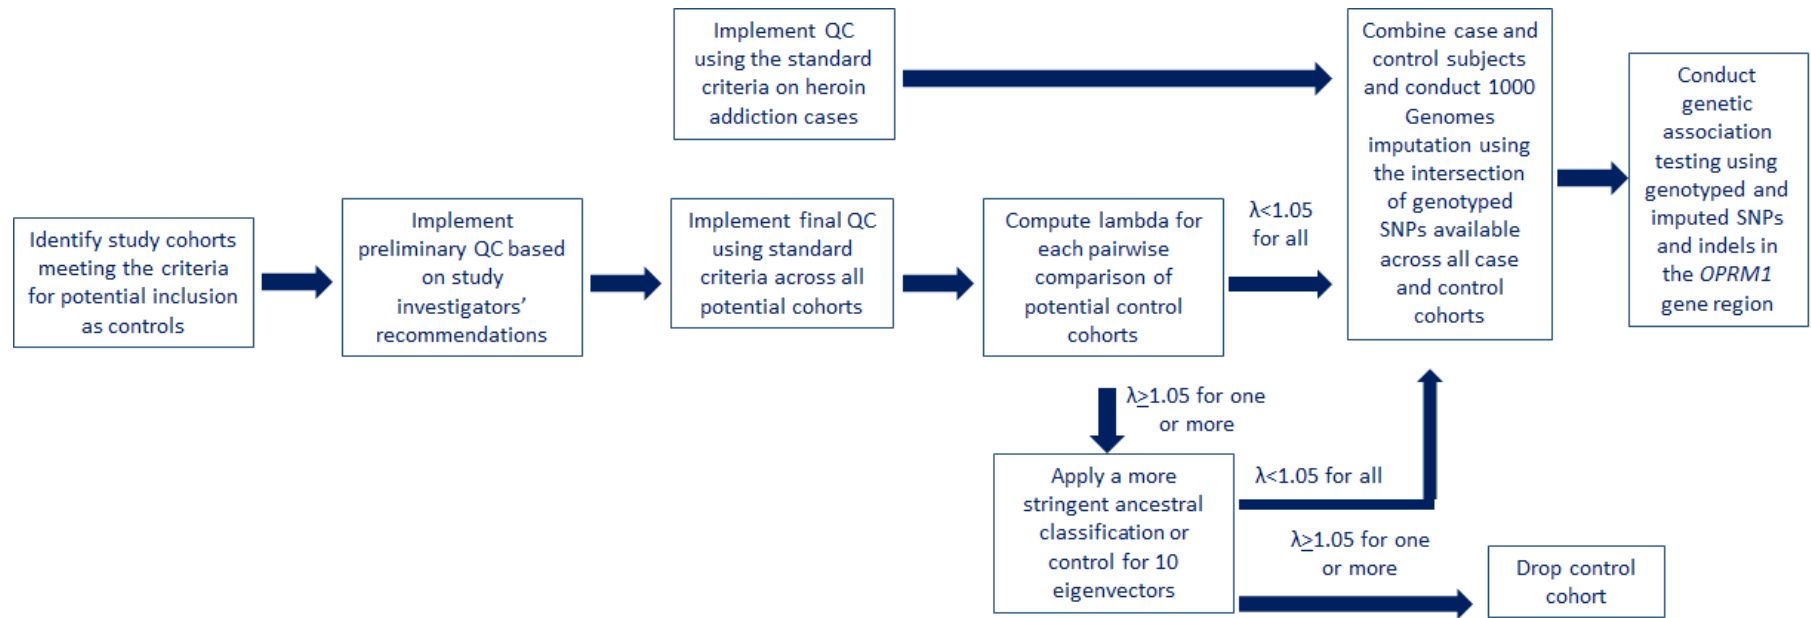

**Figure S2.** Pipeline for generating a control data set for comparison to heroin addiction cases from the Urban Health Study. QC, quality control; SNP, single nucleotide polymorphism.

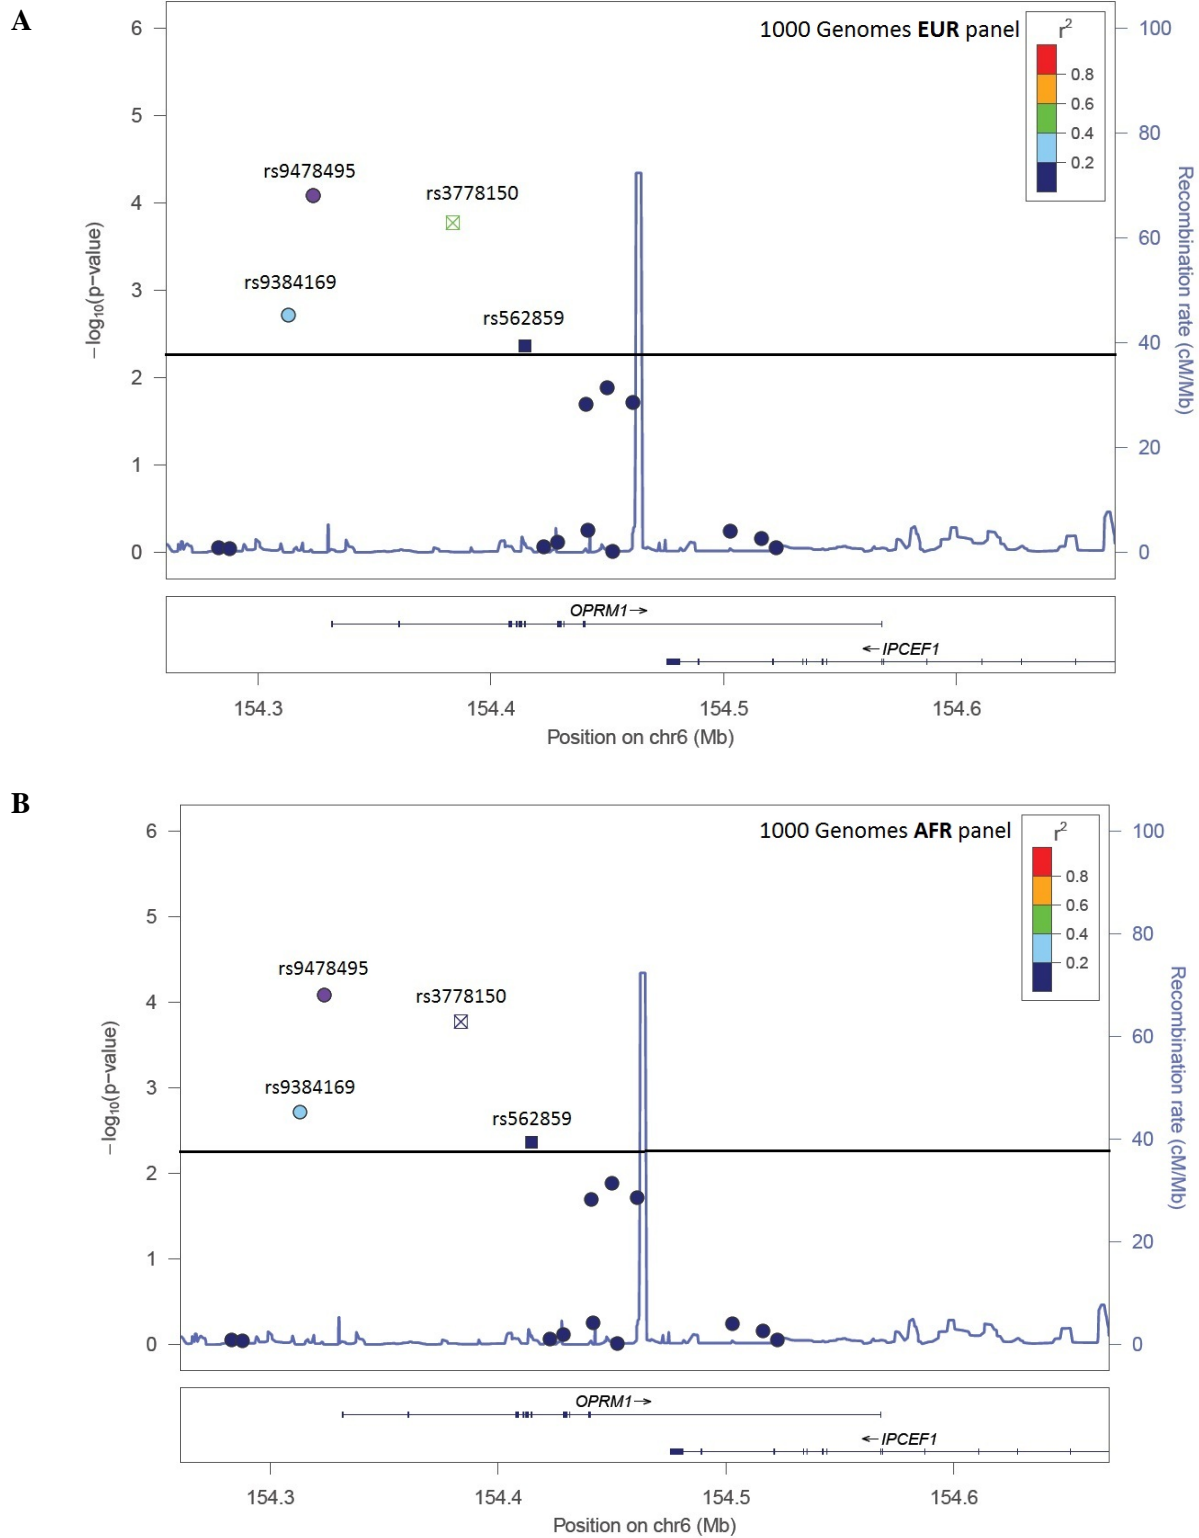

**Figure S3.** Linkage disequilibrium patterns among putative *cis*-eQTL single nucleotide polymorphisms (SNPs) for *OPRM1* and tested for association with heroin addiction. The  $-\log_{10}(P)$  values from the multiancestry meta-analysis in the Urban Health Study are plotted by SNP

chromosomal position, and the four SNPs above the solid black line (meta-analysis  $P < 0.005$ ) were tested for replication. Correlations between rs9478495 (in purple) and the 15 other putative *cis*-eQTL SNPs are shown with reference to 1000 Genomes populations of (A) European (denoted EUR) and (B) African (denoted AFR) ancestry. Annotation shows the SNPs that are located in an intergenic or intronic region (solid circles), an exon (solid square indicative of a synonymous SNP), or a region highly conserved in placental mammals (square with diagonal lines).

A

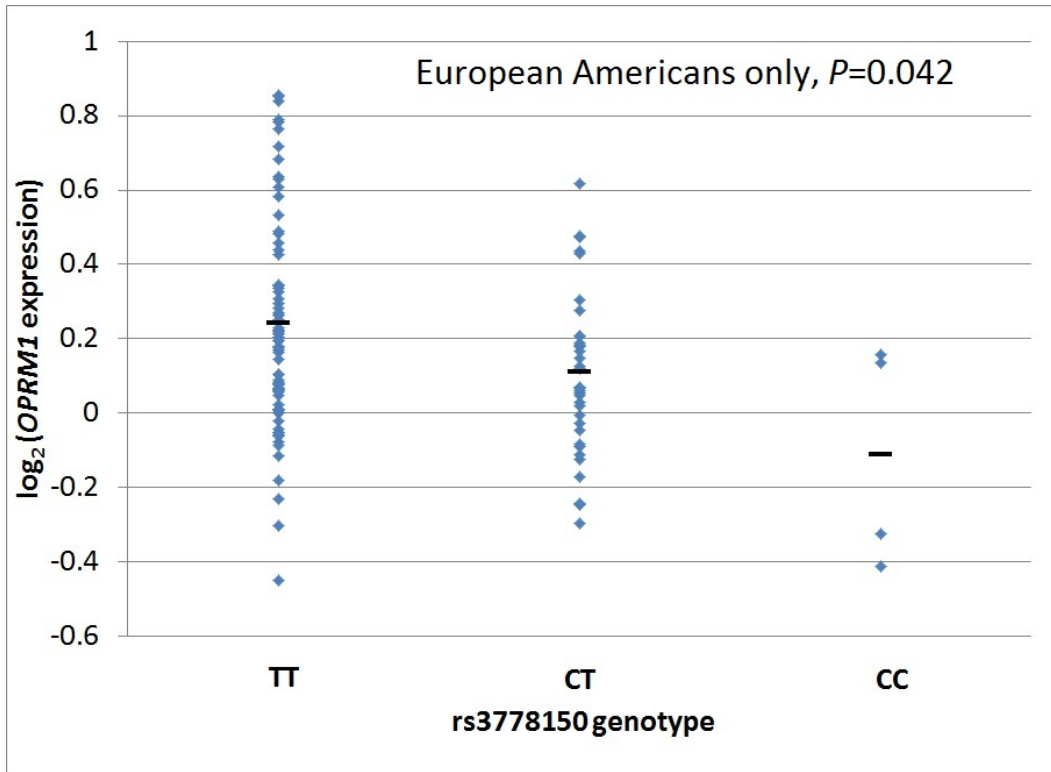

B

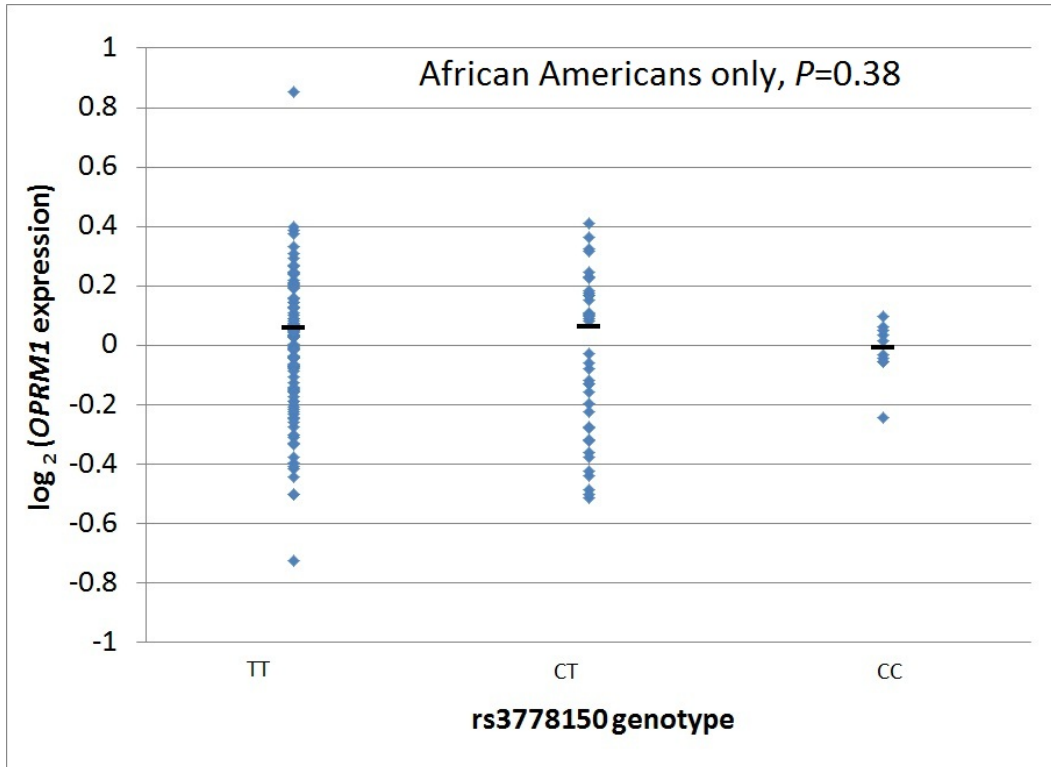

C

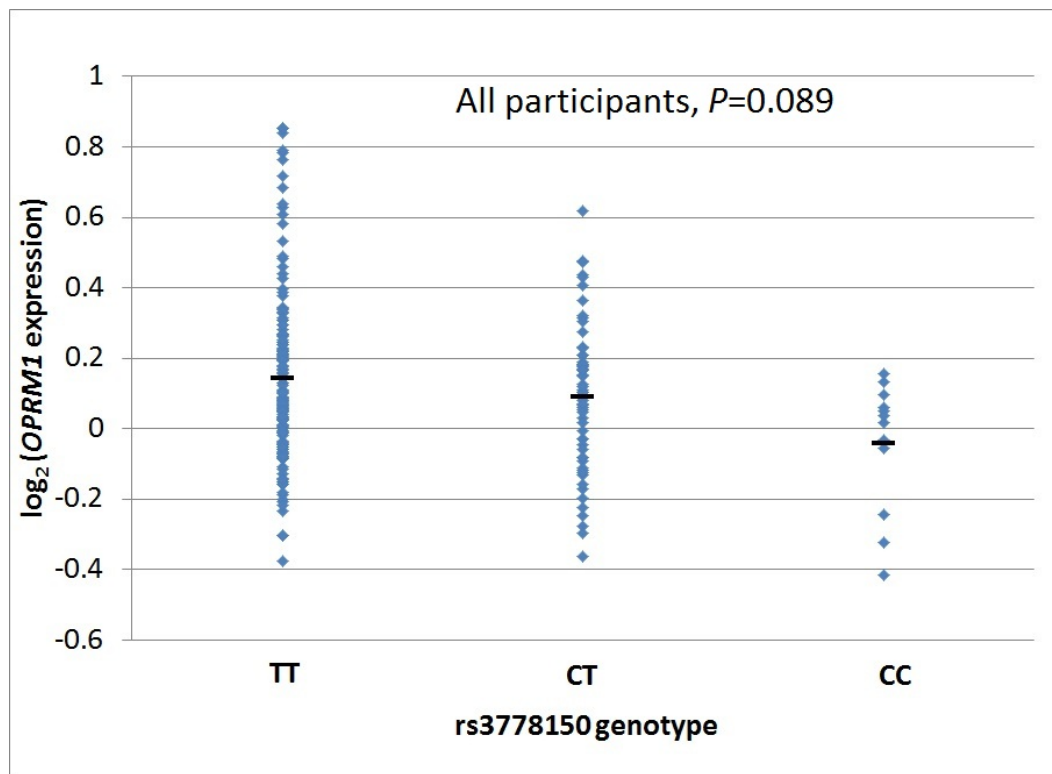

**Figure S4.** *OPRM1* expression as stratified by rs3778150 genotype in the BrainCloud cohort. The  $\log_2$  ratio of sample to reference *OPRM1* expression is presented for (A) European Americans only, (B) African Americans only, and (C) all participants combined.

**A**

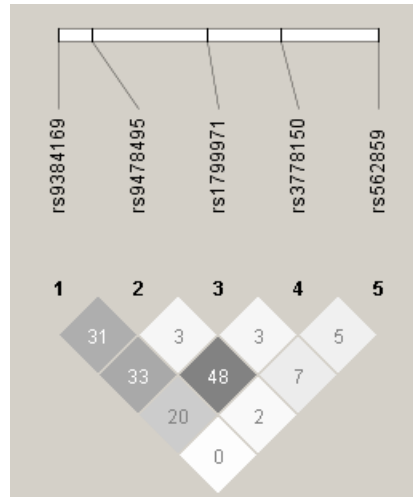

**B**

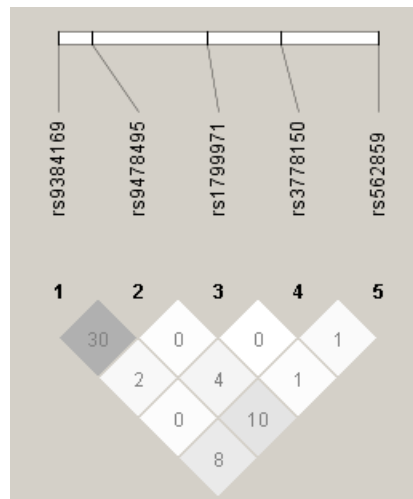

**Figure S5.** Linkage disequilibrium structure, based on  $r^2$  values, among 4 putative *cis*-eQTL single nucleotide polymorphism (SNPs) significantly associated with heroin addiction in the Urban Health Study (rs9384169, rs9478495, rs3778150, and rs562859) and the previously implicated SNP rs1799971. Lighter gray to black shading indicates lower to higher  $r^2$  values, respectively, in 1000 Genomes reference populations of (A) European ancestry and (B) African ancestry.

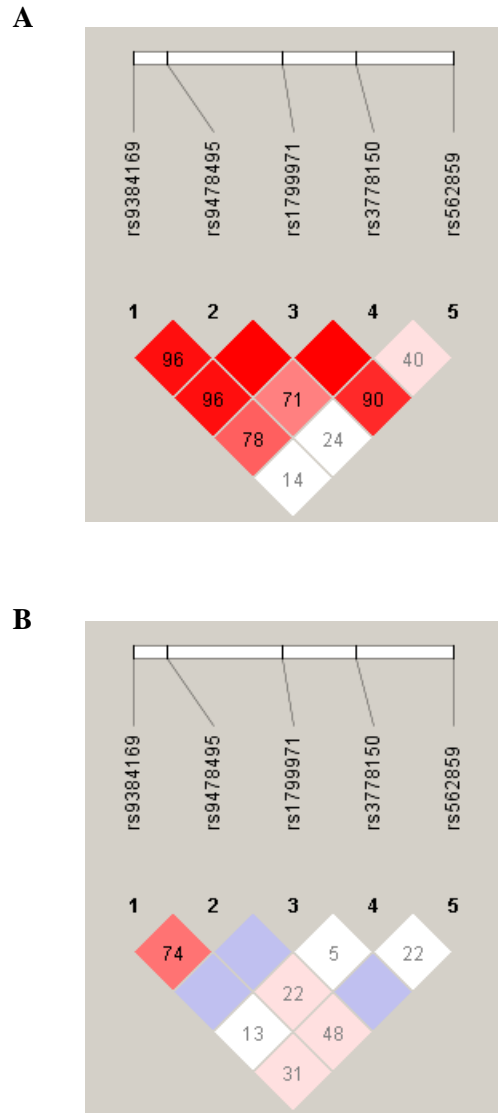

**Figure S6.** Linkage disequilibrium structure, based on  $D'$  values, among 4 putative *cis*-eQTL single nucleotide polymorphism (SNPs) significantly associated with heroin addiction in the Urban Health Study (rs9384169, rs9478495, rs3778150, and rs562859) and the previously implicated SNP rs1799971. Pink to red shading indicates lower to higher  $D'$  values, respectively, in 1000 Genomes reference populations of (A) European ancestry or (B) African ancestry. Purple shading indicates little statistical support for the observed correlation.

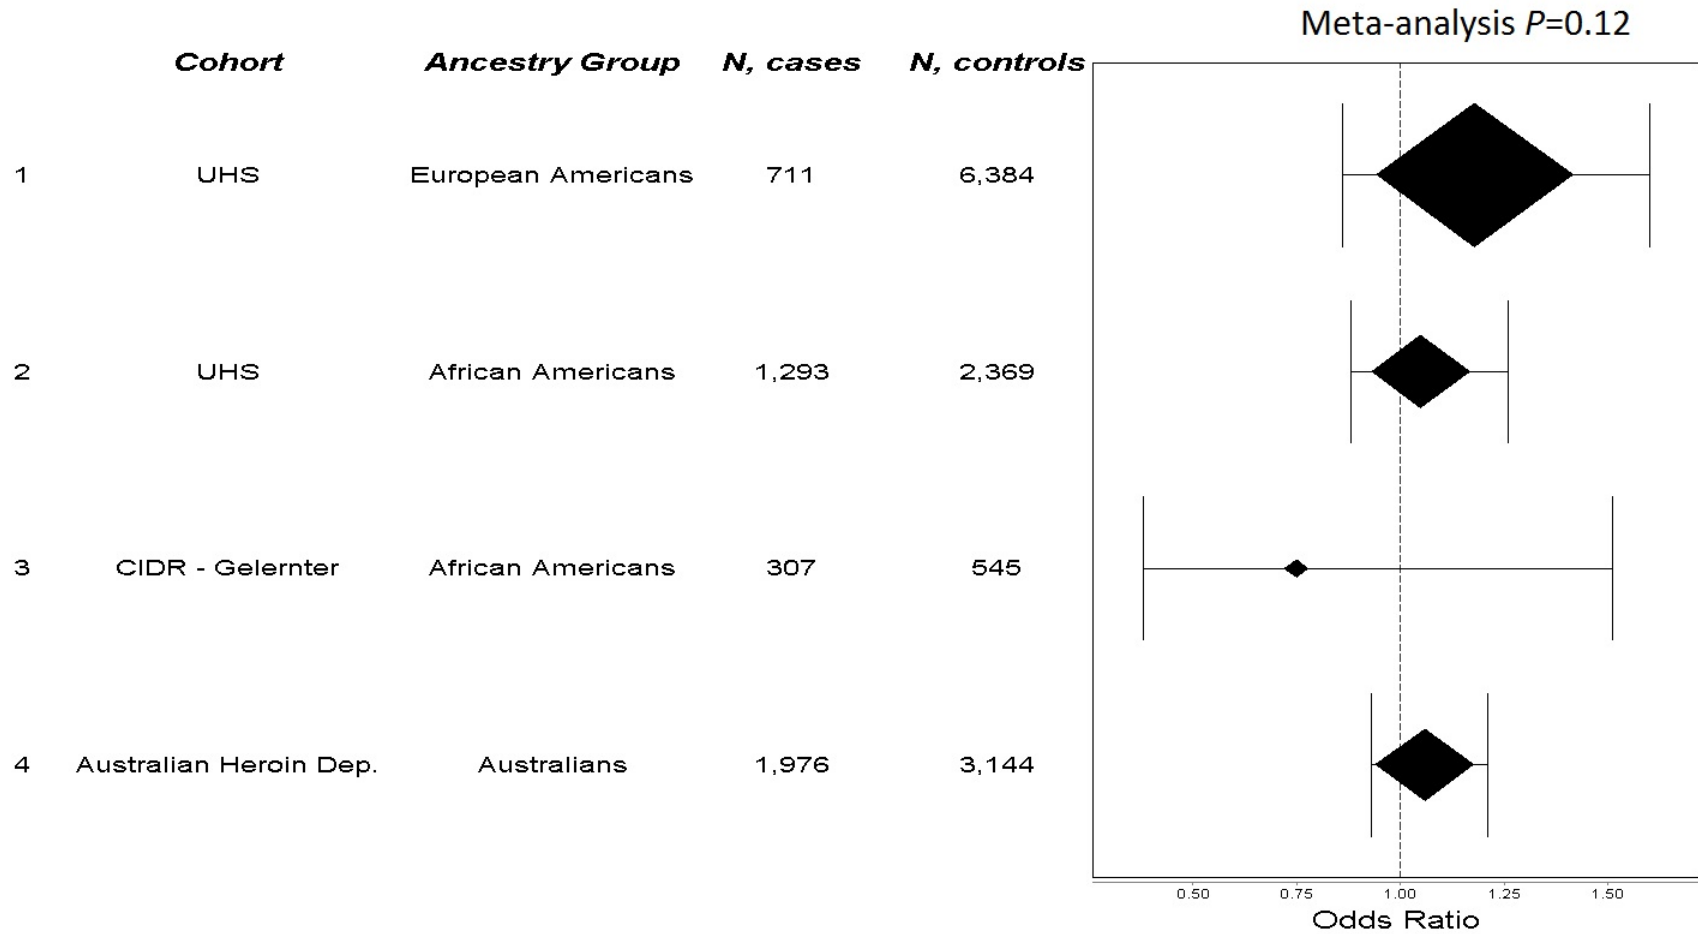

**Figure S7.** Forest plot of association results for the rs1799971-A allele across all cohorts (Urban Health Study [UHS], CIDR – Gelernter Study, and Australian Heroin Dependence Study) and ancestry groups (European Americans, African Americans, and Australians of European ancestry).



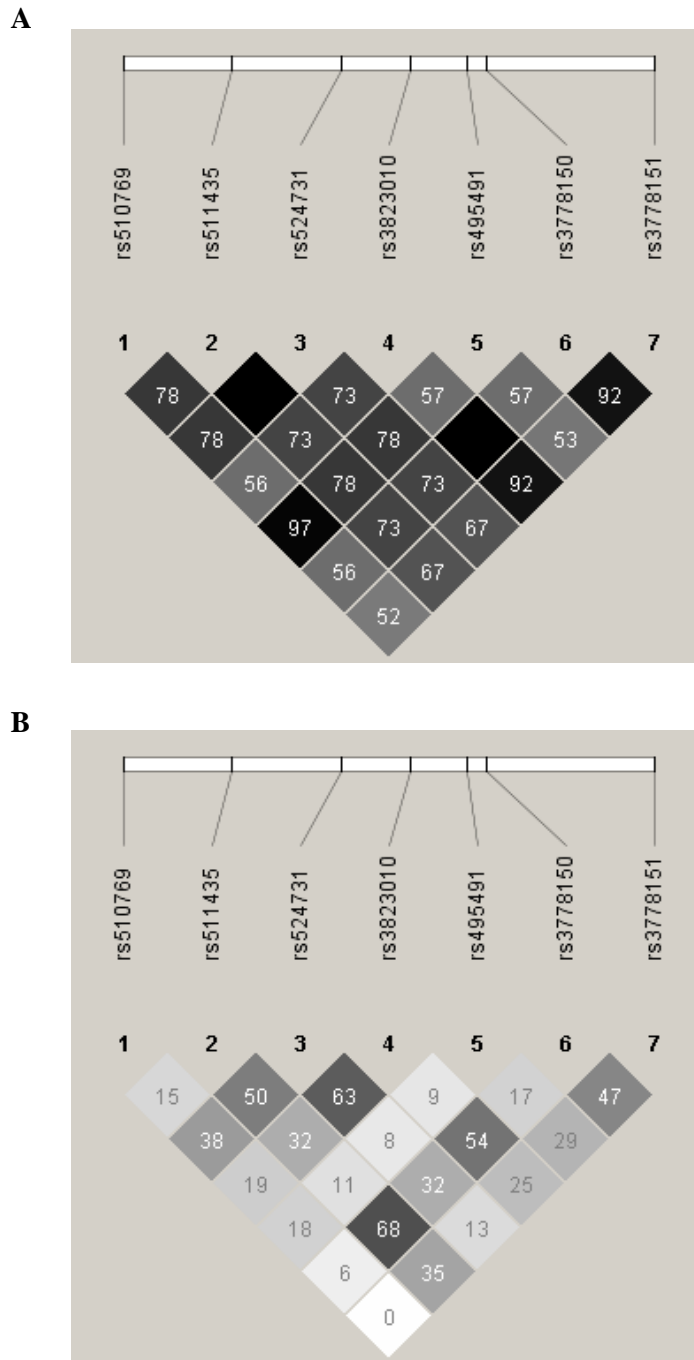

**Figure S8.** Linkage disequilibrium structure, based on  $r^2$  values, for rs3778150 and six other intron 1 single nucleotide polymorphisms having prior suggestive associations with heroin addiction: rs510769, rs511435, rs524731, rs3823010, rs495491, and rs3778151. Lighter gray to black shading indicates lower to higher  $r^2$  values, respectively, in 1000 Genomes reference populations of **(A)** European ancestry and **(B)** African ancestry.

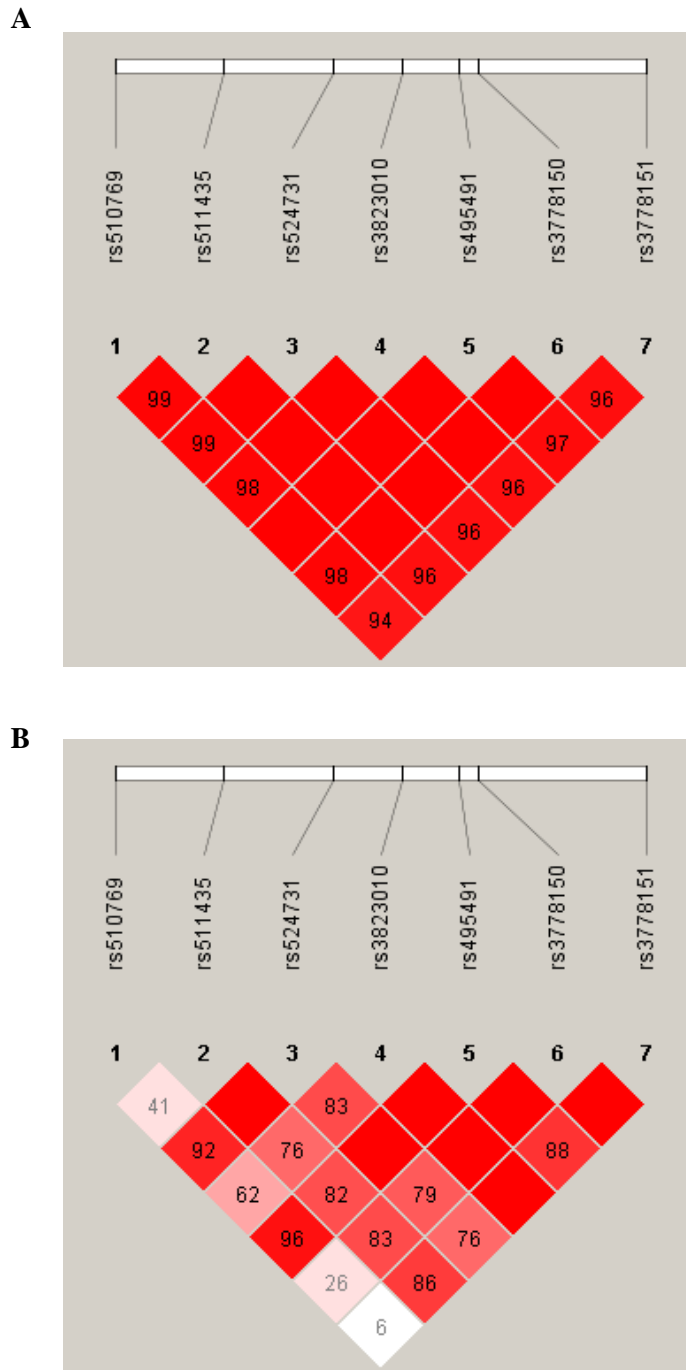

**Figure S9.** Linkage disequilibrium structure, based on  $D'$  values, for rs3778150 and six other intron 1 single nucleotide polymorphisms (SNPs) having prior suggestive associations with heroin addiction: rs510769, rs511435, rs524731, rs3823010, rs495491, and rs3778151. Pink to red shading indicates lower to higher  $D'$  values, respectively, in 1000 Genomes reference populations of (A) European ancestry or (B) African ancestry.

## Supplemental References

1. Colantuoni C, Lipska BK, Ye T, Hyde TM, Tao R, Leek JT, *et al.* (2011): Temporal dynamics and genetic control of transcription in the human prefrontal cortex. *Nature*. 478:519-523.
2. Lipska BK, Deep-Soboslay A, Weickert CS, Hyde TM, Martin CE, Herman MM, *et al.* (2006): Critical factors in gene expression in postmortem human brain: Focus on studies in schizophrenia. *Biological Psychiatry*. 60:650-658.
3. Watters JK, Biernacki P (1989): Targeted sampling: options for the study of hidden populations. *Soc Problems*. 36:416-430.
4. Kral AH, Bluthenthal RN, Lorvick J, Gee L, Bacchetti P, Edlin BR (2001): Sexual transmission of HIV-1 among injection drug users in San Francisco, USA: risk-factor analysis. *Lancet*. 357:1397-1401.
5. Kral AH, Lorvick J, Gee L, Bacchetti P, Rawal B, Busch M, *et al.* (2003): Trends in human immunodeficiency virus seroincidence among street-recruited injection drug users in San Francisco, 1987-1998. *Am J Epidemiol*. 157:915-922.
6. Johnson EO, Hancock DB, Gaddis NC, Levy JL, Page G, Novak SP, *et al.* (in press): Novel genetic locus implicated for HIV-1 acquisition with putative regulatory links to HIV replication and infectivity: a genome-wide association study. *PLoS ONE*.
7. Morral AR, McCaffrey D, Iguchi MY (2000): Hardcore drug users claim to be occasional users: drug use frequency underreporting. *Drug and Alcohol Dependence*. 57:193-202.
8. Rhodes W., Layne M., Johnston P., Hozik L. (2000): *What America's Users Spend on Illegal Drugs 1988-1998*. Office of National Drug Control Policy.
9. Association AP (1994): *Diagnostic and statistical manual of mental disorders: DSM-IV, 4th ed.* Washington DC: American Psychiatric Association.
10. Luca D, Ringquist S, Klei L, Lee AB, Gieger C, Wichmann HE, *et al.* (2008): On the use of general control samples for genome-wide association studies: genetic matching highlights causal variants. *Am J Hum Genet*. 82:453-463.
11. Silverberg MS, Cho JH, Rioux JD, McGovern DP, Wu J, Annese V, *et al.* (2009): Ulcerative colitis-risk loci on chromosomes 1p36 and 12q15 found by genome-wide association study. *Nat Genet*. 41:216-220.
12. Himes BE, Hunninghake GM, Baurley JW, Rafaels NM, Sleiman P, Strachan DP, *et al.* (2009): Genome-wide association analysis identifies PDE4D as an asthma-susceptibility gene. *Am J Hum Genet*. 84:581-593.

13. Gibson J, Griffiths H, De Salvo G, Cole M, Jacob A, Macleod A, *et al.* (2012): Genome-wide association study of primary open angle glaucoma risk and quantitative traits. *Molecular Vision*. 18:1083-1092.
14. Teerlink C, Farnham J, Allen-Brady K, Camp NJ, Thomas A, Leachman S, *et al.* (2012): A unique genome-wide association analysis in extended Utah high-risk pedigrees identifies a novel melanoma risk variant on chromosome arm 10q. *Hum Genet*. 131:77-85.
15. Genovese G, Tonna SJ, Knob AU, Appel GB, Katz A, Bernhardt AJ, *et al.* (2010): A risk allele for focal segmental glomerulosclerosis in African Americans is located within a region containing APOL1 and MYH9. *Kidney Int*. 78:698-704.
16. Purcell S, Neale B, Todd-Brown K, Thomas L, Ferreira MA, Bender D, *et al.* (2007): PLINK: a tool set for whole-genome association and population-based linkage analyses. *Am J Hum Genet*. 81:559-575.
17. Manichaikul A, Mychaleckyj JC, Rich SS, Daly K, Sale M, Chen WM (2010): Robust relationship inference in genome-wide association studies. *Bioinformatics*. 26:2867-2873.
18. Gelernter J, Kranzler HR, Sherva R, Koesterer R, Almasy L, Zhao H, *et al.* (2014): Genome-wide association study of opioid dependence: multiple associations mapped to calcium and potassium pathways. *Biological Psychiatry*. 76:66-74.
19. Pierucci-Lagha A, Gelernter J, Feinn R, Cubells JF, Pearson D, Pollastri A, *et al.* (2005): Diagnostic reliability of the Semi-structured Assessment for Drug Dependence and Alcoholism (SSADDA). *Drug and Alcohol Dependence*. 80:303-312.
20. Nelson EC, Lynskey MT, Heath AC, Wray N, Agrawal A, Shand FL, *et al.* (2014): Association of OPRD1 polymorphisms with heroin dependence in a large case-control series. *Addiction Biology*. 19:111-121.
21. Bucholz KK, Cadoret R, Cloninger CR, Dinwiddie SH, Hesselbrock VM, Nurnberger JI, Jr., *et al.* (1994): A new, semi-structured psychiatric interview for use in genetic linkage studies: a report on the reliability of the SSAGA. *Journal of Studies on Alcohol*. 55:149-158.
22. McEvoy M, Smith W, D'Este C, Duke J, Peel R, Schofield P, *et al.* (2010): Cohort profile: The Hunter Community Study. *International Journal of Epidemiology*. 39:1452-1463.
23. Patterson N, Price AL, Reich D (2006): Population structure and eigenanalysis. *PLoS Genet*. 2:e190.
24. Durbin RM, Abecasis GR, Altshuler DL, Auton A, Brooks LD, Gibbs RA, *et al.* (2010): A map of human genome variation from population-scale sequencing. *Nature*. 467:1061-1073.

25. Johnson EO, Hancock DB, Levy JL, Gaddis NC, Saccone NL, Bierut LJ, *et al.* (2013): Imputation across genotyping arrays for genome-wide association studies: assessment of bias and a correction strategy. *Hum Genet.* 132:509-522.
26. Howie B, Marchini J, Stephens M (2011): Genotype imputation with thousands of genomes. *G3 (Bethesda).* 1:457-470.
27. Hancock DB, Levy JL, Gaddis NC, Bierut LJ, Saccone NL, Page GP, *et al.* (2012): Assessment of Genotype Imputation Performance using 1000 Genomes in African American Studies. *PLoS One.* 7:e50610.
28. Marchini J, Howie B (2010): Genotype imputation for genome-wide association studies. *Nat Rev Genet.* 11:499-511.
29. Jostins L, Morley KI, Barrett JC (2011): Imputation of low-frequency variants using the HapMap3 benefits from large, diverse reference sets. *Eur J Hum Genet.* 19:662-666.
30. Howie B, Fuchsberger C, Stephens M, Marchini J, Abecasis GR (2012): Fast and accurate genotype imputation in genome-wide association studies through pre-phasing. *Nature Genetics.* 44:955-959.
31. Aulchenko YS, Ripke S, Isaacs A, van Duijn CM (2007): GenABEL: an R library for genome-wide association analysis. *Bioinformatics.* 23:1294-1296.
32. Purcell S, Neale B, Todd-Brown K, Thomas L, Ferreira MA, Bender D, *et al.* (2007): PLINK: a tool set for whole-genome association and population-based linkage analyses. *Am J Hum Genet.* 81:559-575.
33. Price AL, Patterson NJ, Plenge RM, Weinblatt ME, Shadick NA, Reich D (2006): Principal components analysis corrects for stratification in genome-wide association studies. *Nat Genet.* 38:904-909.
34. Rice JP, Hartz SM, Agrawal A, Almasy L, Bennett S, Breslau N, *et al.* (2012): CHRNA3 is more strongly associated with Fagerstrom test for cigarette dependence-based nicotine dependence than cigarettes per day: phenotype definition changes genome-wide association studies results. *Addiction.* 107:2019-2028.
35. Bierut LJ, Madden PA, Breslau N, Johnson EO, Hatsukami D, Pomerleau OF, *et al.* (2007): Novel genes identified in a high-density genome wide association study for nicotine dependence. *Hum Mol Genet.* 16:24-35.
36. Mez JB, Cole JW, Howard TD, MacClellan LR, Stine OC, O'Connell JR, *et al.* (2009): Evaluation of self-reported ethnicity in a case-control population: the stroke prevention in young women study. *BMC Research Notes.* 2:260.

37. Haiman CA, Patterson N, Freedman ML, Myers SR, Pike MC, Waliszewska A, *et al.* (2007): Multiple regions within 8q24 independently affect risk for prostate cancer. *Nat Genet.* 39:638-644.
38. Kolonel LN, Henderson BE, Hankin JH, Nomura AM, Wilkens LR, Pike MC, *et al.* (2000): A multiethnic cohort in Hawaii and Los Angeles: baseline characteristics. *Am J Epidemiol.* 151:346-357.
39. Hamza TH, Zabetian CP, Tenesa A, Laederach A, Montimurro J, Yearout D, *et al.* (2010): Common genetic variation in the HLA region is associated with late-onset sporadic Parkinson's disease. *Nat Genet.* 42:781-785.
40. Li C, Liu Z, Wang LE, Gershenwald JE, Lee JE, Prieto VG, *et al.* (2008): Haplotype and genotypes of the VDR gene and cutaneous melanoma risk in non-Hispanic whites in Texas: a case-control study. *International Journal of Cancer.* 122:2077-2084.
41. Li C, Zhao H, Hu Z, Liu Z, Wang LE, Gershenwald JE, *et al.* (2008): Genetic variants and haplotypes of the caspase-8 and caspase-10 genes contribute to susceptibility to cutaneous melanoma. *Human Mutation.* 29:1443-1451.
